1                   **Complex functional phenotypes of NMDA receptor disease variants**

2           Gary J Iacobucci, Ph.D.<sup>\*,1,#</sup>, Beiyong Liu, Ph.D.<sup>\*,1</sup>, Han Wen, Ph.D.<sup>2</sup>, Brittany Sincox<sup>1</sup>, B.S.,  
3                   Wenjun Zheng, Ph.D.<sup>2,§,#</sup>, Gabriela K. Popescu, Ph.D.<sup>1,§,#</sup>

4   \* equal contributions

5   <sup>1</sup> Department of Biochemistry, Jacobs School of Medicine and Biomedical Sciences, State Uni-  
6   versity of New York at Buffalo

7   <sup>2</sup> Department of Physics, College of Arts and Sciences, State University of New York at Buffalo

8   <sup>§</sup> Senior coauthors

9   <sup>#</sup> To whom correspondence should be addressed

10   **Gary J Iacobucci:** Department of Biochemistry, Jacobs School of Medicine and Biomedical  
11   Sciences, University at Buffalo, Buffalo, NY 14203 [garyiaco@buffalo.edu](mailto:garyiaco@buffalo.edu) Tel (716-829-3738)

12   **Gabriela K Popescu:** Department of Biochemistry, Jacobs School of Medicine and Biomedical  
13   Sciences, University at Buffalo, Buffalo, NY 14203; [popescu@buffalo.edu](mailto:popescu@buffalo.edu); Tel (716-829-3738)

14   **Wenjun Zheng:** Department of Physics, College of Arts and Sciences, University at Buffalo,  
15   SUNY, Buffalo NY 14260; [wjzheng@buffalo.edu](mailto:wjzheng@buffalo.edu); Tel (716-645-2947).

16  
17   Keywords: NMDA receptor, disease variants; double mutant cycle analysis, gating, targeted mo-  
18   lecular dynamics, single-molecule, and single-channel patch clamp

19  
20   Running title: Mechanism of NMDA receptor disease variants

21 **Abstract (217 words)**

22 NMDA receptors have essential roles in the physiology of central excitatory synapses and their  
23 dysfunction causes severe neuropsychiatric symptoms. Recently, a series of genetic variants have  
24 been identified in patients, however, functional information about these variants is sparse and  
25 their role in pathogenesis insufficiently known. Here we investigate the mechanism by which  
26 two GluN2A variants may be pathogenic. We use molecular dynamics simulation and single-  
27 molecule electrophysiology to examine the contribution of GluN2A subunit-residues, P552 and  
28 F652, and their pathogenic substitutions, P552R and F652V, affect receptor functions. We found  
29 that P552 and F652 interact during the receptors' normal activity cycle; the interaction stabilizes  
30 receptors in open conformations and is required for a normal electrical response. Engineering  
31 shorter side-chains at these positions (P552A and/or F652V) caused a loss of interaction energy  
32 and produced receptors with severe gating, conductance, and permeability deficits. In contrast,  
33 the P552R sidechain resulted in stronger interaction and produced a distinct, yet still drastically  
34 abnormal electrical response. These results identify the dynamic contact between P552 and F652  
35 as a critical step in the NMDA receptor activation, and show that both increased and reduced  
36 communication through this interaction cause dysfunction. Results show that subtle differences  
37 in NMDA receptor primary structure can generate complex phenotypic alterations whose binary  
38 classification is too simplistic to serve as a therapeutic guide.

39 **Main findings**

- 40 • Two NMDA receptor residues whose substitution results in encephalopathies, were found to  
41 form new interactions during activation, and the energy provided by this interaction is re-  
42 quired for normal receptor gating.

- 43 • Experimental substitutions of these residues that change the strength of their interaction re-
- 44 duce the receptor open probability, unitary conductance, and calcium permeability.
- 45 • Receptors with variations at these positions identified in patients display a broad range of
- 46 both gain- and loss-of-function changes depending on the stimulation protocol.

47 **Introduction (1062 words)**

48 N-methyl-d-aspartate (NMDA) receptors are glutamate-gated excitatory channels with critical  
49 roles in the normal development and function of the nervous system. They are principal media-  
50 tors of synaptic formation, maturation, and plasticity throughout the life span. In turn, both their  
51 insufficient and excessive activation have been long known to cause severe neuropathologies.  
52 More recently, gene sequencing approaches in patients with neuropsychiatric disorders have  
53 identified alterations in the primary structure of *GRIN* genes, which encode NMDA receptor  
54 subunits<sup>1-7</sup>. To help with patient stratification and therapy development, several publicly-  
55 available databases centralize information on the rapidly increasing number of clinically reported  
56 variants<sup>8</sup>. This aggregation has made apparent several challenges that, at present, obscure the  
57 disease mechanism of these variants.

58 First, rather than being specific and localized to specific genetic/structural regions, the identified  
59 genetic alterations are diverse and widely spread over the entire length of all seven NMDA re-  
60 ceptor subunits. Second, a direct correlation between the primary structure of NMDA receptors  
61 subunits and their functional output remains elusive. Lastly, how NMDA receptor responses af-  
62 fect the normal physiology of the central nervous system, and specifically which of their proper-  
63 ties are important at a particular time and place, is only superficially understood. To date more  
64 than 4,000 *GRIN* variants have been identified in human populations. About half of these have  
65 no reported clinical phenotype and are currently classified as “benign.” The remainder display  
66 clinical features ranging in impact from mild to severe and include developmental delay, epilep-  
67 sy, schizophrenia, intellectual disability, autism spectrum disorders, attention-deficit and hyper-  
68 activity disorders, visual impairment, hypotonia, speech disorders, movement disorders, and mi-  
69 crocephaly<sup>9-11</sup>. In part, this pleiotropy likely reflects the receptor’s diverse and dynamic contri-

70 butions to ongoing normal functionality of synapses, neurons, and circuits. It also reflects the  
71 complex and insufficiently understood relationship between the receptor's primary structure and  
72 its healthy operation.

73 NMDA receptors are obligate heterotetramers that assemble from two obligatory GluN1 subu-  
74 nits, encoded by *GRIN1*, and a collection of two GluN2 or GluN3 subunits, encoded by *GRIN2A-*  
75 *D* and *GRIN3A-B*, respectively. Consistent with its required role for NMDA receptor assembly  
76 and expression, GluN1 subunits are widely expressed across brain regions and developmental  
77 stages; and animals lacking the GluN1 perish at birth due to respiratory failure<sup>12, 13</sup>. In contrast,  
78 the expression of GluN2 and GluN3 subunits is developmentally and regionally controlled, and  
79 animals lacking these subunits have severe but non-lethal phenotypes<sup>14</sup>. Disease-associated vari-  
80 ants have been identified in all eight NMDA-receptor encoding genes, attesting for the critical  
81 and non-redundant roles of individual subunits.

82 Tetrameric NMDA receptors are large (~4,500 residues) transmembrane proteins. About two-  
83 thirds of residues are extracellular and are organized into two layers, each consisting of four  
84 globular domains. The membrane-distal N-terminal layer forms modulator-binding sites and in-  
85 fluences the channel open probability, but is dispensable to agonist-dependent activation<sup>15, 16</sup>.  
86 Likely, mutations in this layer affect the receptor's sensitivity to allosteric modulators. The  
87 membrane proximal ligand-binding layer consists of four globular domains, which form binding  
88 sites for the physiologic co-agonists glutamate and glycine. Agonists stabilize a more compact  
89 set of receptor conformations and energetically couple with increased mechanical tension in the  
90 three short linkers that connect each ligand-binding module to one of three transmembrane heli-  
91 ces (M1, M3, and M4). Together with a short M2 helix, which inserts in the membrane as a P-  
92 loop from the cytoplasmic surface, transmembrane helices surround the cation-permeable pore,

93 and residues on the M3 helix opposite to the cytoplasmic surface form the agonist-controlled  
94 gate. The ligand-binding and transmembrane domains, together with the linkers that connect  
95 them form the core of the NMDA receptor channels in that they are required and sufficient for  
96 their defining function as glutamate-gated excitatory channels. The cytoplasmic domain is large;  
97 it represents about a third of receptor mass; and although it is dispensable for glutamate-gated  
98 currents<sup>17</sup>, animals lacking this domain are not viable<sup>18</sup>. This observation, together with the lack  
99 of a specific associations between disease-related variants and the receptor's various structural  
100 domains, indicate critical roles for all receptor domains in the normal physiology of the central  
101 nervous system.

102 Although identified simply as glutamate-gated excitatory channels, NMDA receptors are com-  
103 plex multifunctional proteins. In addition to binding glutamate, their typical activation cycle also  
104 includes interactions with a host of organic and inorganic ions and molecules as diverse as inor-  
105 ganic cations such as protons, magnesium, and calcium, and a host of organic molecules, which  
106 include glycine, polyamines, steroids, and several proteins. In turn, the residues that form these  
107 external ligand-binding sites are internally connected to the channel gate through complex net-  
108 works of allosteric interactions. In effect, these internal interaction networks transform the bind-  
109 ing energy contributed by ligands into conformational changes that alter the receptor's overall  
110 function. Therefore, structural variations as minor as a single-residue substitution can affect the  
111 intensity and duration of its glutamate-elicited ionic current by changing how ligands bind or  
112 how the binding energy is transmitted to the gate. Of the patient-derived variants that have been  
113 classified as pathogenic, fewer than half have been examined functionally, and even fewer have a  
114 proposed mechanism<sup>1, 5, 6, 19-29</sup>. In part, this is because the activation mechanism of NMDA re-  
115 ceptors is complex and insufficiently understood<sup>30, 31</sup> making correlation between *in vitro* char-

116 acterization and *in vivo* behavior difficult<sup>32, 33</sup>. To begin to explain how NMDA receptor muta-  
117 tions alter receptor functions and how to restore pharmacologically their normal operation, it is  
118 necessary to outline the mechanism by which individual residues contribute to the receptor's  
119 normal operation and how their substitution alters receptor responses.

120 In a previous study, we used molecular dynamics simulations and identified pairs of interacting  
121 residues whose strength of interaction changes during activation. Among these, several corre-  
122 sponded to sites where variations are pathogenic<sup>34</sup>. Specifically, GluN2A F652, which has been  
123 associated with epilepsy, contacted in a state-dependent manner GluN1 R801, for which no vari-  
124 ation has yet been reported, and GluN2A P552, which is also associated with epilepsy. We hy-  
125 pothesized that mutations at either GluN2A F652 or GluN2A P552 may work through the same  
126 mechanism, namely by changing their interaction which is intrinsic to the activation sequence.  
127 Here, we report evidence for the direct chemical coupling between F652 and P552 during recep-  
128 tor opening and show that mutations at these sites, regardless of whether they weaken or  
129 strengthen the native interaction, result in severe deficits in receptor open probability. Notably,  
130 these deficits produced distinct functional phenotypes, which could not be predicted by simple  
131 functional characterization.

## 132 **Methods**

### 133 *Cell culture and molecular biology*

134 HEK293 cells (ATCC CRL-1573) at the passages 25 – 32 were maintained in Dulbecco's Modi-  
135 fied Eagle Medium with 10% Fetal Bovine Serum and 1% glutamine. Cells were incubated at  
136 37°C in 5% CO<sub>2</sub> and 95% atmospheric air. Prior to experiments, cells were transfected with rat  
137 GluN1-1a (U08262.1), GluN2A (M91561.1), or mutants as indicated, and GFP cDNA at a 1:1:1  
138 ratio using polyethylenimine<sup>35</sup>. The transfected cells were grown for 24 – 48 h in medium sup-  
139 plemented with 10 mM Mg<sup>2+</sup> to prevent excitotoxicity. All mutations were introduced by using  
140 the QuickChange method (Stratagene, La Jolla, CA) and verified by DNA sequencing.

141

### 142 *Electrophysiology*

143 Stationary single-channel currents were recorded with the cell-attached patch-clamp technique at  
144 holding potential +100 mV. Borosilicate pipettes (15 – 25 MΩ) contained (extracellular, in mM):  
145 150 NaCl, 2.5 KCl, 0.1 EDTA, 10 HEPBS, 0.1 glycine, 1 glutamate, pH 8.0 (adjusted with  
146 NaOH). Currents were amplified and filtered at 10 kHz (Axopatch 200B; 4-pole Bessel), sam-  
147 pled at 40 kHz (PCI-6229, M Series card, National Instruments, Austin, TX) and written into  
148 digital files with QuB acquisition software (University at Buffalo, Buffalo, NY). For the exper-  
149 iments with Ca<sup>2+</sup>, patches were held at potentials between -100 to -20 mV, in 20 mV increments.

150 Macroscopic currents were recorded with the whole-cell patch-clamp technique using borosili-  
151 cate pipettes (2 – 4 MΩ) containing (intracellular, in mM): 135 CsCl, 33 CsOH, 0.5 CaCl<sub>2</sub>, 2  
152 MgCl<sub>2</sub>, 11 EGTA, 10 HEPES, pH 7.4 (adjusted with CsOH) and clamped at -70 mV. Extracellu-  
153 lar solutions contained (in mM): 150 NaCl, 2.5 KCl, 0.5 CaCl<sub>2</sub>, 0.01 EDTA, 0.1 glycine, 1 glu-



154 tamate, 10 HEPBS, pH 8.0 (NaOH). Currents were amplified and filtered at 2 kHz (Axopatch  
155 200B; 4-pole Bessel), sampled at 5 kHz (Digidata, 1440A) and written into digital files with  
156 pClamp 10 acquisition software (Molecular Devices, Sunnyvale, CA). Clamped cells were  
157 extracellularly perfused with solutions using BPS-8SP solenoid-valve perfusion system (ALA  
158 Scientific Instruments, Westbury, NY). Free  $\text{Ca}^{2+}$  concentrations were calculated with the soft-  
159 ware MAXC ([www.maxchelator.stanford.edu](http://www.maxchelator.stanford.edu)).

160 To evaluate receptor permeability to  $\text{Ca}^{2+}$ , we determined reversal potential ( $E_{\text{rev}}$ ) of macroscopic  
161 currents by applying voltage ramps from -100 mV to +60 mV over 4 sec on glutamate-elicited  
162 steady state currents in several external  $\text{Ca}^{2+}$  concentrations. Currents were leak-subtracted using  
163 currents elicited with voltage ramp in the absence of glutamate. Liquid junction potentials were  
164 measured in each condition using the  $\text{K}^+$  salt-bridge method<sup>36</sup>.  $E_{\text{rev}}$  was calculated by a linear fit  
165 between -20 to +20 mV using the current-voltage data corrected for leak current and liquid junc-  
166 tion potentials The magnitude of the  $\text{Ca}^{2+}$ -induced shift in  $E_{\text{rev}}$  relative to  $\text{Ca}^{2+}$ -free conditions  
167 was related to  $\text{Ca}^{2+}$  permeability using the Lewis equation<sup>37</sup>:

$$168 \quad \frac{P_{\text{Ca}}}{P_{\text{Na}}} = \frac{\left[ \exp\left(\frac{\Delta E_{\text{rev}} F}{RT}\right) \right] [\text{Na}^+]_o \left[ 1 + \exp\left(\frac{E_{\text{rev}, \text{Ca}}}{RT/F}\right) \right]}{4[\text{Ca}^{2+}]_o} \quad (1)$$

169

## 170 *Data Analysis*

171 Single-channel traces were corrected for noise artifacts and baseline drift and idealized in QuB  
172 software with the segmental-k-means (SKM) algorithm after applying a 12 kHz digital low-pass  
173 filter<sup>38</sup>. All subsequent analyses of idealized records were done in QuB with the maximum in-  
174 terval log-likelihood (MIL) algorithm after imposing a conservative dead time (75  $\mu\text{s}$ )<sup>39</sup>. Rate

175 constants were estimated by fitting a model with five closed and two open states (5C2O) directly  
176 to the idealized data<sup>40</sup>. To determine the duration-weighted rate constants to be used for macro-  
177 scopic current simulation, the model was fit globally to data pooled across all patches. Bursts of  
178 activity were defined as openings separated by closures shorter than a critical duration ( $\tau_{\text{crit}}$ ) cal-  
179 culated to exclude desensitized periods. Once defined, bursts were extracted and analyzed sepa-  
180 rately.

181 Macroscopic currents were analyzed in Clampfit 10.7 (Molecular Devices). Steady-state ( $I_{\text{ss}}$ ) cur-  
182 rent amplitude was measured as the average current amplitude at the end of a 5 or 10 sec pulse of  
183 glutamate at the indicated concentration. For dose-response analysis,  $I_{\text{ss}}$  measured at each dose  
184 was normalized to the max  $I_{\text{ss}}$  measured in 0.1 mM glutamate. To estimate the effective gluta-  
185 mate binding rate for receptors containing GluN2A<sup>P552R</sup>, time constants were determined by fit-  
186 ting a single-component exponential function to estimate the effective activation time-course  
187 ( $\tau_{\text{rise}}$ ). The resulting time constants were plotted against the inverse of agonist concentration as  
188 conventional for a two-site ligand binding model.  $K_{\text{on}}$  was determined from the slope of a linear  
189 fit to this data.

190

### 191 *Simulations*

192 Macroscopic current traces were calculated as the time-dependent accumulation of receptors in  
193 open states using kinetic models and unitary amplitudes derived from single-molecule record-  
194 ings. All receptors occupied initially a glycine-bound glutamate-free resting state connected to  
195 fully liganded state C3 with the rate constants determined previously for wild-type receptors<sup>41</sup>.

196 Simulations were performed in MATLAB 2017a (Mathworks) using the built-in matrix exponen-  
197 tial function, *expm*. We used the rate constants derived in QuB to construct a matrix (*A*) of *n* × *n*  
198 size where *n* is the number of states in the model and each element is the rate constant value be-  
199 tween the corresponding states. A deterministic simulation of the occupancy of all states with  
200 time resolution, *dt*, was performed by solving iteratively:

$$201 \quad P(t + dt) = \text{expm}(dt \cdot A) \cdot P(t) \quad (2)$$

202 The final macroscopic current amplitude was calculated by summing the occupancies of both  
203 open states in the model at each time point. Total charge transfer was calculated as the integral of  
204 the resulting current waveform.

205

### 206 *Molecular Dynamics Simulations*

207 The core GluN1/GluN2A structural model used in this study was generated by homology model-  
208 ing followed by targeted-molecular dynamics simulations<sup>34, 42</sup>. Briefly, the GluN1/GluN2A ho-  
209 mology model was generated with SWISS-MODEL using the GluN1/GluN2B crystal structure  
210 (4tlm)<sup>43</sup> to leverage its superior resolution of linker residues and the several reported distinct  
211 conformations which can be used as templates for targeted molecular dynamics (MD) simula-  
212 tions<sup>44</sup>. Targeted MD simulations were performed with NAMD V2.9b using a putative active-  
213 state structure as the target conformation<sup>44</sup>. In all MD trajectories, only the last 150 ns period  
214 was used for energy analysis and the last 10 ns period was used for HOLE calculation<sup>45</sup>. We  
215 estimated inter-residue Van der Waals energies with the NAMDenergy module in the VMD  
216 program<sup>46, 47</sup>.

217

218 *Statistics*

219 All results are presented as means with the associated standard errors (mean  $\pm$  sem). Statistical  
220 significance of differences was evaluated with the paired or unpaired *t* test, as appropriate. Dif-  
221 ferences were considered significant for  $p < 0.05$ .

222

223 **Results**

224 *Intrasubunit coupling between residues in the GluN2A D1-M1 linker and M3 helix*

225 In previous work, we used targeted MD simulation of a core GluN1/GluN2A construct lacking  
226 both N- and C-terminal domains (N1 $_{\Delta$ N $_{\Delta$ C}/N2A $_{\Delta$ N $_{\Delta$ C}) to identify pairs of side-chains predicted to  
227 engage in state-specific interactions during NMDA receptor activation<sup>34</sup> (**Figure 1a**). Among  
228 these, we prioritized for functional testing residues for which naturally occurring variants were  
229 suspected as the cause of behavioral dysfunctions, as annotated in contemporary databases<sup>48</sup>.  
230 We found that residues located on the short segments linking LBD with TMD, rather than acting  
231 simply as non-specific mechanical springs<sup>49</sup>, form specific chemical interactions, which catalyze  
232 the channel-opening reaction, and are critical for the receptor's physiological function. Motivat-  
233 ed by this new insight, we considered additional residue pairs flagged by the MD simulation as  
234 potentially forming state-dependent chemical contacts.

235 We noted that P552, which resides on the GluN2A D1-M1 linker, contacted four proximal resi-  
236 dues on the same subunit: F652 and N648 on the M3 helix, and R801 and N803 on the D2-M4  
237 linker (**Figure 1b**). Of these putative interactions, we chose to examine in more depth the rela-  
238 tionship between GluN2A-P552 and GluN2A-F652 for two reasons. First, along the closed-to-

239 open trajectory of the MD simulation, their side chains moved closer together as measured by  
240 center of mass (COM) distance, and formed more favorable Van der Waals (VdW) interactions  
241 in the open state relative to the initial conformation (**Figure 1b, Figure S1**). Second, variants  
242 with substitutions at these positions have been identified in patients with epilepsy and intellectual  
243 disability, suggesting that they have a critical role in receptor's biological function in the central  
244 nervous system <sup>4, 5</sup>. As a preliminary step in our study, we used the open structural model we  
245 generated previously <sup>34</sup> to ask whether removing the side-chains of GluN2A-P552 and GluN2A-  
246 F652 would affect the VdW contact energy between these residues. Results for receptors con-  
247 taining GluN2A-P552A or GluN2A-F652A showed significant change in VdW contact energy  
248 consistent with the disruption of a gating-favorable interaction (**Figure 1c, Figure S1**). We hy-  
249 pothesized that state-dependent interactions between these residues represents a critical step in  
250 the opening sequence, which when disrupted cause pathological electrical signaling.

251 We proceeded to test this hypothesis by measuring the strength of the interaction between P552  
252 and F652 in full-length receptors expressed in HEK 293 cells using double-mutant cycle anal-  
253 yses <sup>50</sup>. In this approach, the residues suspected of functional coupling are mutated both individ-  
254 ually and together, and the free-energy landscape of the gating reaction is measured for each var-  
255 iant, to estimate the individual and combined effects of the two residues. If the change observed  
256 for the double mutant is simply the arithmetic sum of the changes observed for individual muta-  
257 tions, the residues likely make independent contributions to gating; whereas departures from  
258 simple addition indicate that the residues interact and the interaction energy contributes specifi-  
259 cally to gating. Importantly, when the energy landscape is computed from measurements ob-  
260 tained from single-molecule observations, results inform not only globally about the roles played

261 by the probed residues in the overall activation sequence, but they quantify explicitly their con-  
262 tributions to each gating step.

263 We recorded equilibrium activity from receptors engineered to contain GluNA<sup>P552A</sup>,  
264 GluN2A<sup>F652V</sup>, or GluN2A<sup>P552A, F652V</sup>, in combination with wild-type GluN1-1a as described pre-  
265 viously<sup>51</sup> (**Figure 1d**). We could not observe macroscopic or microscopic currents from recep-  
266 tors containing the GluN2A<sup>F652A</sup> variant (data not shown), and the activity of receptors contain-  
267 ing GluN2A<sup>F652V</sup> was dramatically impaired, suggesting that this position is critical for gating.  
268 Records obtained from wild-type receptors and the remaining three variants were processed and  
269 used for kinetic modeling to estimate rate constants for each receptor's activation sequence with  
270 the usual methods<sup>52, 53</sup>. Next, we validated the reaction schemes obtained by comparing the  
271 waveform of their predicted macroscopic response with experimentally recorded whole-cell cur-  
272 rents (**Figure 1d**). Based on the satisfactory match between responses predicted with models de-  
273 rived from single-channel data and those recorded directly from cells expressing each variant, we  
274 used the models to calculate free-energy landscapes for each receptor, and to estimate the cou-  
275 pling free energy for the double-mutant thermodynamic cycle<sup>34, 54</sup> (**Figure 1e**). Results show a  
276 net surplus of 1.52 kJ/mol free energy ( $\Delta\Delta G_{\text{int}}$ ) for the double mutant over the entire gating reac-  
277 tion, which indicates that P552 and F652 interact substantially during gating, and the energy  
278 generated by this interaction makes an important contribution to the physiologic gating kinetics  
279 of NMDA receptors.

280 Considering in more detail the steps within the activation sequence of each variant, we noted that  
281 the interaction between P552 and F652 had the largest impact in the later steps of the gating se-  
282 quence, and facilitated specifically the C<sub>2</sub>-C<sub>1</sub> (-1.4 kcal/mol) and O<sub>1</sub>-O<sub>2</sub> (1.56 kcal/mol) transi-  
283 tions. This result suggests that the contacts between P552 and F652, which are favorable to

284 channel opening, occur after the receptors transitions through pre-open conformations and they  
285 serve to stabilize open-gate conformations. This interpretation is consistent with the results from  
286 the targeted MD simulation, which predicted a reduction in side-chain distance between these  
287 residues during activation, and an increased energetic interaction; whereas side-chain truncation  
288 of either or both residues reduced the VdW energy (**Figure 1b, c**). Together with the results from  
289 our thermodynamic analysis these observations support the view that in wild-type receptors, the  
290 side-chains of P552 and F652 contribute essentially to the normal opening of NMDA receptors;  
291 therefore, preceding glutamate-induced movements in the LBD that bring these residues within  
292 interaction distance will catalyze the opening reaction by forming a chemical link that stabilizes  
293 the open-pore conformation. A corollary of this finding is that substitutions at these positions  
294 that prevent the harnessing of LBD kinetic energy into chemical energy to stabilize the open  
295 state, will present gating deficits, as illustrated by the functional analyses for receptors with trun-  
296 cated side chains described above. However, it remains unanswered whether the variants identi-  
297 fied in patients affect NMDA receptor function simply because they lack this interaction.

298

299 *Disease-associated variants modify interactions between the D1-M1 linker and the M3 helix*

300 Pathogenic variations in GluN2A at P552 and F652 have been identified in patients; specifically,  
301 GluN2A<sup>F652V</sup> (ClinVar: VCV000088733.1)<sup>5</sup> and GluN2A<sup>P552R</sup> (ClinVar: VCV000039663.3)<sup>4</sup>  
302 (**Figure 2a, left**) are accompanied by an array of neurological dysfunctions. It is therefore im-  
303 portant to ascertain whether these specific mutations affect receptor function with the same  
304 mechanism as described above for mutants with side-chain truncations. When we introduced the-  
305 se naturally occurring substitutions in the structural model of activated receptors, we observed  
306 that they had distinct effects on the VdW energy of interaction. Relative to wild-type receptors,

307 receptors with GluN2A<sup>F652V</sup> had less favorable interaction energy between P552 and V652,  
308 whereas receptors with GluN2A<sup>P552R</sup> had substantially more favorable interaction energy be-  
309 tween R552 and F652 (**Figure 2b, Figure S1**). Previous studies have already documented that  
310 both these mutations have strong effects on gating<sup>5, 20</sup>. However, the mechanism by which the  
311 described changes occur remains unresolved.

312 To characterize the gating reactions of these two naturally occurring variants we recorded cell-  
313 attached currents from patches with a single active receptor and subjected these data to kinetic  
314 analyses and modeling (**Figure 2c**). We observed substantial alterations in the gating profiles of  
315 both variants. Notably, for receptors containing GluN2A<sup>P552R</sup>, we could only discern four closed  
316 states, rather than the typical five observed for native receptors; and for both variants the transi-  
317 tion rates between the kinetic states detected were profoundly altered. Relative to wild-type re-  
318 ceptors, the computed free-energy landscapes were substantially elevated for both variants, with  
319 kinetic states sitting in shallower wells and being separated by larger barriers. For receptors con-  
320 taining GluN2A<sup>P552R</sup>, the largest transition barrier occurred early in the gating reaction such that,  
321 at equilibrium, substantially fewer receptors transitioned into open states; however, the fewer  
322 receptors that managed to open, remained open for longer times, being unable to return to states  
323 from which agonists could dissociate to terminate the activation reaction (**Figure 2c**). This  
324 mechanism explains well the previously reported changes in macroscopic current, including in-  
325 creased agonist potency and efficacy, slower rise time, and slower deactivation<sup>5, 20</sup>. However, it  
326 is important to note that these macroscopic behaviors can only be observed for the few receptors  
327 that happen to open during the observation window (<5 s), whereas the majority of receptors re-  
328 main electrophysiologically silent. By observing an individual channel over a large period (>30  
329 min) we obtained a more realistic view of the receptor's energy landscape.



330 We noted large variability in the kinetic properties of these receptors (**Figure 2d; Table S1**). Ex-  
331 cept for their open probability within bursts ( $P_{o,burst}$ ) and their unitary current amplitudes ( $i$ ), both  
332 variants had substantially more variable open probability ( $P_o$ ), mean open times (MOT), and  
333 mean closed times (MCT) relative to wild-type receptors. Specifically, GluN2A<sup>P552R</sup> had highly  
334 variable open durations, such that although longer on average, the difference was not statistically  
335 significant relative to wild-type receptors. Notably, the two variants had distinct burst structures,  
336 with substantially higher open probability for GluN2A<sup>P552R</sup> and lower open probability for  
337 GluN2A<sup>F652V</sup>.

338 These functional results are consistent with the predictions from the MD simulation (**Figure 2b**),  
339 where GluN2A<sup>P552R</sup> displayed VdW interactions more favorable to opening relative to the wild-  
340 type residues. This may be explained by the larger sidechain surface area available for contacts.  
341 In addition, we observed an electrostatic cation- $\pi$  interaction between the arginine side chain and  
342 the aromatic ring of phenylalanine, which likely contributes further energy to strengthen the in-  
343 teraction between these residues in open receptors. This interpretation is consistent with the ob-  
344 served longer openings and shorter closures durations in bursts for GluN2A<sup>P552R</sup>. In contrast,  
345 GluN2A<sup>F652V</sup> which was predicted to have fewer VdW contacts and less favorable interaction  
346 energy with P552 produced shorter openings and longer closures within bursts. We conclude that  
347 stronger interactions between residues located on the D1-M1 linker and the M3 helix contribute  
348 directly to the stability of open-gate conformations and increase channel open times and open  
349 probability within bursts.

350

351 *Interactions between residues in the D1-M1 linker and M3 helix modulate receptor permeation*

352 Both GluN2A<sup>F652V</sup> and GluN2A<sup>P552R</sup> had lower unitary current amplitudes (**Table S1; Figure**  
353 **2c**). Given that our single channel measurements were done with sodium as the main permeant  
354 ion to facilitate detection of gating steps<sup>55</sup>, these measurements do not offer information about  
355 possible changes in the Ca<sup>2+</sup> content of the reduced currents. To determine whether these muta-  
356 tions affected Ca<sup>2+</sup> permeability, which is a critical aspect of NMDA receptor signals, by meas-  
357 uring the relative permeability of Ca<sup>2+</sup> to monovalent ions ( $P_{Ca}/P_{Na}$ ) using the magnitude of the  
358 shift in measured reversal potential ( $E_{rev}$ ) of macroscopic currents (**Figure 3a, b**). We elicited  
359 whole-cell currents from each mutant and applied a voltage ramp protocol on the steady-state  
360 current to measure the reversal potential ( $E_{rev}$ ) at several external Ca<sup>2+</sup> concentrations.

361 We found relative to wild-type receptors ( $P_{5Ca}/P_{Na} = 2.7 \pm 0.5$ ,  $P_{10Ca}/P_{Na} = 2.7 \pm 0.2$ ,  $n = 5$ ),  
362 channels harboring GluN2A<sup>P552R</sup> exhibit reduced Ca<sup>2+</sup> permeation in 5 mM ( $P_{5Ca}/P_{Na} = 1.2 \pm 0.1$ ,  
363  $n = 10$ ,  $p = 0.04$ ) and 10 mM Ca<sup>2+</sup> ( $P_{10Ca}/P_{Na} = 1.1 \pm 0.2$ ,  $n = 6$ ,  $p = 1.2E-4$ ). By contrast, chan-  
364 nels harboring GluN2A<sup>F652V</sup> exhibit similar Ca<sup>2+</sup> permeation in 5 mM ( $P_{5Ca}/P_{Na} = 1.7 \pm 0.4$ ,  $n =$   
365  $6$ ,  $p = 0.17$ ) and 10 mM Ca<sup>2+</sup> ( $P_{10Ca}/P_{Na} = 2.3 \pm 0.4$ ,  $n = 5$ ,  $p = 0.35$ ) compared to wild-type.

366 Further, we measured for each receptor the slope unitary conductance in several external Ca<sup>2+</sup>  
367 concentrations and calculated the amount of Ca<sup>2+</sup>-dependent reduction in unitary conductance  
368 (Ca<sup>2+</sup> block) as described previously<sup>56</sup> (**Figure 3c**). Wild-type receptors exhibit high Na<sup>+</sup> unitary  
369 conductance ( $\gamma_{Na} = 85.5 \pm 3.0$ ,  $n = 5$ ) which decreases with increasing extracellular Ca<sup>2+</sup> concen-  
370 trations ( $\gamma_{2Ca} = 39.7 \pm 1.1$ ,  $n = 7$ ,  $p = 1.8E-4$ ;  $\gamma_{5Ca} = 18.9 \pm 0.7$ ,  $n = 5$ ,  $p = 1.2E-4$ ). This corre-  
371 sponds with strong Ca<sup>2+</sup> block ( $\gamma_{Na}/\gamma_{2Ca} = 0.46$ , 95% CI = 0.45 – 0.48;  $\gamma_{Na}/\gamma_{5Ca} = 0.22$ , 95% CI =  
372 0.21 – 0.23). Receptors harboring GluN2A<sup>P552R</sup> showed decreased Na<sup>+</sup> conductance ( $\gamma_{Na} = 50.5 \pm$   
373  $1.6$ ,  $n = 6$ ,  $p = 2.5E-4$  to WT), which decreases with increases extracellular Ca<sup>2+</sup> concentrations

374 ( $\gamma_{2Ca} = 31.6 \pm 1.2$ ,  $n = 7$ ,  $p = 4.3E-4$  to WT;  $\gamma_{5Ca} = 18.5 \pm 0.3$ ,  $n = 8$ ,  $p = 0.60$  to WT). This corre-  
375 sponds with reduced  $Ca^{2+}$  block compared to wild type receptors ( $\gamma_{Na}/\gamma_{2Ca} = 0.63$ , 95% CI = 0.60  
376 – 0.65;  $\gamma_{Na}/\gamma_{5Ca} = 0.37$ , 95% CI = 0.35 – 0.38). Similarly, receptors harboring GluN2A<sup>F652V</sup>  
377 showed decreased  $Na^+$  conductance ( $\gamma_{Na} = 50.4 \pm 2.1$ ,  $n = 6$ ,  $p = 9.5E-5$  to WT), which decreases  
378 with increases extracellular  $Ca^{2+}$  concentrations ( $\gamma_{2Ca} = 33.7 \pm 0.3$ ,  $n = 13$ ,  $p = 1.4E-3$  to WT;  $\gamma_{5Ca}$   
379 =  $18.7 \pm 0.5$ ,  $n = 6$ ,  $p = 0.83$  to WT). This corresponds with reduced  $Ca^{2+}$  block compared to wild  
380 type receptors ( $\gamma_{Na}/\gamma_{2Ca} = 0.67$ , 95% CI = 0.66 – 0.69;  $\gamma_{Na}/\gamma_{5Ca} = 0.37$ , 95% CI = 0.36 – 0.39).  
381 Thus, both mutation render these receptors less sensitive to the blocking effects of  $Ca^{2+}$ .

382

### 383 *Disease-associated variants display a broad and complex set of functional changes*

384 The previous functional characterization of GluN2A<sup>P552R</sup> and GluN2A<sup>F652V</sup> variants suggested  
385 that both these variants are ‘gain-of-function’ mutations based on an observed increase in charge  
386 transfer and longer mean open durations<sup>5, 20</sup>. However, given the large variability we observed  
387 for these mutants we undertook a systematic evaluation of the functional impact of the mutation  
388 relative to wild-type, by combining our gating and permeation data to estimate changes in re-  
389 sponses to physiological pulses of glutamate.

390 We performed glutamate dose-response measurements for the two mutants. The response of  
391 GluN2A<sup>F652V</sup> was unchanged relative to wild type:  $EC_{50}$ ,  $4.3 \pm 0.2 \mu M$ , vs  $3.2 \pm 0.1 \mu M$ , and  $h$ ,  
392  $1.33 \pm 0.07$  vs.  $1.31 \pm 0.04$ ). Therefore, for this mutant we used wild-type glutamate binding  
393 rates for our simulations. In contrast, and consistent with previous reports<sup>20</sup>, GluN2A<sup>P552R</sup> had  
394 substantially higher glutamate affinity ( $EC_{50}$ ,  $0.51 \pm 0.02 \mu M$ ,  $h = 0.95 \pm 0.03$ ) (**Figure 4a**).  
395 Therefore, to simulate dynamic responses we needed to measure the glutamate binding rate for

396 this variant. Given this receptor's low  $P_o$ , measuring the microscopic rates for glutamate associa-  
397 tion and dissociation would be intractable with a single-channel approach. Instead, we measured  
398 the apparent association and dissociation rate constants by fitting the rising and decay phases of  
399 the macroscopic current elicited with pulses of glutamate, sufficient to equilibrate the response  
400 (**Figure 4b**). We used the rates derived from fitting the model globally to all the single-channel  
401 records in each condition and the rates for glutamate association and dissociation, to simulated  
402 the macroscopic response to a prolonged exposure to saturating glutamate. We observed robust  
403 agreement between responses predicted by the models and the experimentally recorded whole-  
404 cell responses for wild-type, GluN2A<sup>F652V</sup> and GluN2A<sup>P552R</sup>, indicated that the models capture  
405 the essential features of the reaction mechanism (**Figure 4c**; **Table S2**). Based on this result, we  
406 used the model to evaluate the potential impact of these variants on the response to several phys-  
407 iological-like stimuli.

408 First, we simulated responses to a single synaptic-like pulse of glutamate (1 ms, 1 mM) in the  
409 continuous presence of glycine (**Figure 4d**). For a defined number of channels, both  
410 GluN1/GluN2A<sup>P552R</sup> and GluN1/GluN2A<sup>F652V</sup> produced substantially smaller currents than wild-  
411 type receptors. When normalized to the peak current amplitude, GluN2A<sup>P552R</sup> current had slower  
412 rise and decay phases consistent with previous reports in recombinant and transfected neuronal  
413 systems<sup>20</sup>. Further, when we quantified the total  $Ca^{2+}$ -charge transferred per channel across the  
414 full simulation time and glutamate concentrations, we found that at all concentrations,  
415 GluN2A<sup>F652V</sup> receptors consistently transferred less  $Ca^{2+}$  than wild-type receptors. In contrast,  
416 the  $Ca^{2+}$  transferred by GluN2A<sup>P552R</sup> varied with glutamate concentration such that, at concentra-  
417 tions above 10  $\mu$ M, it approached levels seen with wild-type receptors.

418 Extrasynaptic receptors likely experience chronic neurotransmitter exposure, initiate apoptotic  
419 pathways, and contribute to neurological disorders <sup>57</sup>. Like with synaptic simulations,  
420 GluN2A<sup>F652V</sup> consistently transferred 100-fold less charge than wild-type. In contrast,  
421 GluN2A<sup>P552R</sup> transferred more charge at lower glutamate concentrations whereas at concentra-  
422 tions greater than 0.1  $\mu$ M these receptors transferred less charge than wild-type. (**Figure 4e**).

423 We next evaluated the degree of potentiation in response to repetitive brief stimulation to mimic  
424 periods of high-frequency transmission. In wild-type receptors, the degree of potentiation dissi-  
425 pates as the duration between pulses lengthens <sup>41</sup>. In the simulations performed here, relative to  
426 wild-type receptors, GluN2A<sup>F652V</sup> receptors exhibited greater potentiation at shorter interpulse  
427 intervals. In contrast, GluN2A<sup>P552R</sup> exhibited larger potentiation at longer interpulse intervals  
428 (**Figure 4f**). To assess channel sensitivity to a broad range of a physiologic range of stimuli fre-  
429 quency (0.2 – 200 Hz), we quantified the cumulative charge transfer per channel over 60 sec of  
430 stimulation. While both variants passed less total charge per minute compared to wild-type, the  
431 GluN2A<sup>P552R</sup> variant exhibited less sensitivity over this range of stimuli frequencies.

432 Similarly, in response to a theta-like burst, within a given train of stimuli, the maximal  
433 GluN2AF652V current appeared within the first epoch whereas the maximal GluN2AP552R cur-  
434 rent appeared within later epochs of the protocol (**Figure 4g**). Thus, in addition to their primary  
435 deficit of reduced total charge transfer, different variants may exhibit delayed, time-dependent  
436 phenotypes depending on the physiological stimulation protocol.

437

## 438 **Discussion**

439 Results reported here provide a systematic single-molecule characterization of the impact of two  
440 *Grin2A* disease variants on di-heteromeric receptor kinetics. We show that these two variants  
441 occur at sites critical to receptor gating whose interaction is necessary for normal function. To-  
442 gether with previous studies<sup>34, 58</sup>, these results provide additional evidence for a role of direct  
443 interactions between residues on the GluN2A pre-M1 helix with those on the M3 helices of  
444 GluN2A and GluN1, as an intrinsic part of the gating machinery. Thus, the probability of chan-  
445 nel opening and the stability of the open state are highly sensitive to atomic-level variations at  
446 these positions such that missense mutations will likely result in altered receptor responses. In  
447 addition, we found that structural variations at this interface also impact channel permeation  
448 properties.

449 Presently the full spectrum of biological functions of NMDA receptors is unknown. A major and  
450 critical role for NMDA receptors in the pathophysiology of the central nervous system is to pro-  
451 duce a Ca<sup>2+</sup>-rich depolarizing current (excitatory) in the postsynaptic neuron. However, biologi-  
452 cal function depends critically on many other receptor capabilities, such as voltage-dependent  
453 Mg<sup>2+</sup> block, glycine binding, etc. In addition, NMDA receptors are expressed at non-synaptic  
454 sites and in non-neuronal cells such as glia and are also present in tissues outside of the CNS,  
455 where their roles remain obscure.

456

### 457 *The multiple roles of the pre-M1 linker during gating*

458 In all ionotropic glutamate receptors, the LBD is connected to the pore domain by three linkers  
459 D1-M1, D2-M3, and D2-M4. Identifying the precise motions of linkers during gating has been

460 complicated by their high degree of freedom resulting in an inability to reliably resolve them  
461 structurally<sup>59-61</sup>. Nevertheless, accumulating functional, genetic, and structural evidence in re-  
462 cent years has implicated linkers in mediating receptor function beyond serving as inert elements  
463 that tether domains. In NMDA receptors, loosening the D2-M3 linker with inserted glycine resi-  
464 dues increases the opening latency after glutamate exposure demonstrating a role of mechanical  
465 tension in coupling agonist binding to the efficiency of pore opening<sup>62</sup>. Linkers are also sites of  
466 drug binding<sup>63-65</sup>. The GluN1 D2-M3 linker also provides a Ca<sup>2+</sup> binding site necessary for en-  
467 riching the NMDA receptor Ca<sup>2+</sup> current<sup>66</sup>. Both mutagenesis and swapping of linkers between  
468 receptor families have drastic effects on gating<sup>67,68</sup>. In congruence, our previous study revealed  
469 the coupling of the GluN2A D1-M1 linker with the GluN1 M3 helix can be perturbed by a single  
470 isomerization of a residue sidechain<sup>34</sup>. Thus, the specific chemical properties of the linkers are  
471 as important for proper function as their length/mechanical properties.

472 In this study, we add to this pioneering literature by providing evidence for a direct coupling of  
473 the GluN2A D1-M1 linker with the GluN2A M3 helix which occurs late in the activation path-  
474 way, specifically at the C<sub>2</sub>-C<sub>1</sub> and O<sub>1</sub>-O<sub>2</sub> transitions (**Figure 1**). This interaction likely serves  
475 multiple roles including mediating efficient pore opening and stabilizing the open state and (**Fig-  
476 ure 5**). We also note, that the GluN2A D1-M1 linker makes contacts with other structural ele-  
477 ments including the GluN1 D2-M4 linker (**Figure 1b**), which may play a role in channel desensi-  
478 tization and provide insight into the profound effects the GluN2A<sup>P552R</sup> variant exhibited on de-  
479 sensitization (**Figure 2b**). In tandem with previous findings,<sup>34,58</sup>, the D1-M1 linker makes sev-  
480 eral interactions and its rearrangement is a necessary and rate limiting step in the gating pathway.  
481 Decoupling the D1-M1 linker by inserting additional glycine residues is sufficient to perturb gat-  
482 ing suggesting that agonist-induced tension in this linker is a rate limiting step in channel func-

483 tion. Furthermore, glycine insertion proximal to GluN2A P552 is sufficient to abolish receptor  
484 function<sup>58</sup>. This supports both mechanical and chemical fidelity of the linker as necessary for  
485 function. This is because, in addition to loosening the mechanical tension of the linker, glycine  
486 insertion would also displace P552 relative to its native interacting partners, such as F652, there-  
487 by altering the efficiency of the chemical coupling of D1-M1 with M3

488 Our results show strong coupling between D1-M1 linker and M3 at multiple steps in the activa-  
489 tion pathway and thus suggest that the GluN2A D1-M1 linker is multifunctional. Consistent with  
490 this, its coupling with peripheral M4 helices<sup>58, 69</sup> occurs during gating and may underlie the fast  
491 component of gating. We have shown previously that the GluN2A D1-M1 linker can interact  
492 with the GluN1 M3 gate-forming helix to specifically stabilize its open position<sup>34</sup>. Thus, specific  
493 motions of the D1-M1 linker may underlie different functionally distinct states in the gating reac-  
494 tion.

495

#### 496 *Classification and treatment of NMDA receptor missense variants*

497 In 2015, about 3.4 million people in the US were diagnosed with active epilepsy. Despite numer-  
498 ous pharmacologic treatment options available, only 44 % of those with active epilepsy report  
499 seizure control<sup>70</sup> consistent with reported rates of drug-resistant epilepsy<sup>71</sup>. These numbers  
500 highlight the need for more defined pathophysiology and mechanism-targeted therapy. Epilepsy  
501 is a broad family of neurological disorders characterize by neuronal hyperexcitability. Numerous  
502 molecular mechanisms have been implicated in the pathogenesis of this heterogeneous family of  
503 disorders. Genetic studies have begun to shed light on this complexity by identifying *GRIN2A*  
504 mutations in severe forms of epilepsy<sup>2</sup>, and *GRIN2A* variants associated with epileptic aphasias



505 accounted for as much as 9 % of cases <sup>3</sup>. Consistent with the causal association with disease  
506 pathogenesis, variant distribution across GluN2A domains was correlated with clinical/  
507 cal/electrophysiological phenotype <sup>72</sup>. Within this study, however, phenotypic variations existed  
508 among individuals with the same variant and it was recognized that the complex functional alter-  
509 ations caused by a *GRIN2A* variant cannot be reduced to a binary description such as loss- or  
510 gain-of-function <sup>72</sup>.

511 The functional impact of a single missense variant may have unique manifestations in different  
512 physiological conditions. For a multifunctional protein with numerous physiological outputs  
513 such as the NMDA receptor, a single mutation may exhibit both gain- and loss-of-function prop-  
514 erties under different stimuli for different physiological outputs (**Figure 4**). This may explain  
515 recent observations showing that disease variants on GluN2A and GluN2B classified as either  
516 gain- or loss-of-function based on microscopic parameters behavior largely indistinguishably *in*  
517 *vivo* <sup>32, 33</sup>. This will impact how variants should be classified and, thus, how to tailor treatment to  
518 individuals harboring a specific mutation. A previous report have classified GluN2A<sup>F652V</sup> variant  
519 as gain-of-function based on a single gating parameter <sup>5</sup>. However, we observe that a single vari-  
520 ant can exhibit either gain- or loss-of-function depending on the parameter measured (**Table S3**).  
521 Here, we note a correlation between the extent of contacts between P552 and F652 and channel  
522 open duration, which supports a key role for this interaction in defining the stability of the open  
523 channel conformations. The GluN2A<sup>F652V</sup> variant has a reduced contact surface area and exhibits  
524 a shorter mean open duration, whereas GluN2A<sup>P552R</sup> increases the extent of contacts and exhibits  
525 longer mean open durations (**Figure 2**). Further N2A<sup>P552A</sup>, which only moderately reduces the  
526 number of contacts, has a less substantial impact on gating (**Figure 1**)<sup>73</sup>. Therefore, when inter-

527 preting the functional effect of a variant, it is important to consider the physicochemical proper-  
528 ties of the variant not only the site of the missense substitution.

529 This has important implications when designing treatment regimens for patients with specific  
530 mutations. Furthermore, different disease-variants, even at distant sites of action, can have pro-  
531 found influence on affinity and mechanism of drug action. GluN2A<sup>P552R</sup> receptors are among the  
532 variants reported to have substantially reduced affinity and distinct mechanism of action of an  
533 Alzheimer's drug derivative<sup>74</sup>. Therefore, not only is a comprehensive functional and kinetic  
534 analysis of a disease variant is necessary prior to designing and testing therapeutics, but also an  
535 investigation of the effect of a specific variant on the pharmacodynamics of existing drugs.

536

#### 537 *The case for design of state-specific pharmacological modulation*

538 Given the causal association of NMDA receptor variants with epilepsy pathogenesis, pharmaco-  
539 logical targeting of NMDA receptors holds promising therapeutic potential. However, because  
540 NMDA receptors are indispensable to synaptic physiology, global modulation of receptor func-  
541 tion can result in neurotoxicity. Therefore, there is interest in designing modulators that target  
542 specific receptor functions<sup>75</sup>. This may in part underlie the success of memantine in the clinical  
543 treatment of neurological disorders. For example, recent evidence suggests that memantine can  
544 specifically modulate Ca<sup>2+</sup>-dependent inhibition of channels<sup>76</sup>. This strategy requires knowledge  
545 of the precise structural elements and their dynamics which underlie specific receptor functions.  
546 This remains a large knowledge gap in the field. Our approach of using structural model-guided  
547 mutagenesis with single-molecule derived kinetic characterization begins to bridge this gap.

548 Several recent studies suggest that modulators targeted to linker regions can independently con-  
549 trol gating and permeation<sup>65</sup>. This is consistent with our observation that mutations in this region  
550 exhibited lower unitary amplitudes and altered Ca<sup>2+</sup> permeation<sup>34</sup> (**Figure 3**). In addition, subtle  
551 changes in the chemical structure of modulators acting in this region can change a negative allo-  
552 steric modulator to a positive allosteric modulator<sup>64</sup>. This is consistent with our observation that  
553 a single isomerization mutation that alters the interaction between the GluN2A D1-M1 linker and  
554 the GluN1 M3 helix is sufficient to decrease function<sup>34</sup>. The use of empirical kinetic models to  
555 map precise structural elements to specific receptor functions provides a workflow for the design  
556 of function-specific pharmacological modulators. The use of kinetic mechanism-based pharma-  
557 cological targeting represents a new avenue for precision medicine<sup>77</sup>.

558 Although the number of identified variants continues to rise, only few have been characterized  
559 functionally and remains unknown which reported functional changes cause pathology. Given  
560 that several functional attributes of NMDA receptors are critical for the normal physiologic re-  
561 sponse and thus for their biological role, it remains unknown how any variant affects the patho-  
562 physiology of the cells in which it is expressed and further the behavior of the individual patient.  
563 Most neuropsychiatric conditions that are currently associated with NMDA receptor dysfunction  
564 are complex and of unresolved etiology such as: epilepsy, language disorders, motor disorders,  
565 learning disorders, autism, attention deficit hyperactivity disorder, developmental delay, and  
566 schizophrenia. Therefore, the field will require more in depth understanding of receptor opera-  
567 tion before rendering rational therapeutic strategies.

568 **Acknowledgements**

569 We thank Jamie Abbott, PhD for helpful critiques and technical support in cell culture and mo-  
570 lecular biology. This study was funded by NIH R01NS108750 and R01NS097016 to GKP.  
571 GJI and GKP conceived the study. HW and WZ performed and analyzed MD simulations. GJI,  
572 BL, and BS performed and analyzed electrophysiology experiments. GJI, BL, and GKP prepared  
573 figures and wrote the manuscript.

574 **Conflict of Interest**

575 All authors declare no financial or non-financial conflicts of interest with the content of this arti-  
576 cle.

577 Supplementary information is available at MP's website.

578 **References**

- 579 1. Fernandez-Marmiesse A, Kusumoto H, Rekarte S, Roca I, Zhang J, Myers SJ *et al.* A  
580 novel missense mutation in GRIN2A causes a nonepileptic neurodevelopmental disorder.  
581 *Mov Disord* 2018; **33**(6): 992-999.
- 582  
583 2. Lemke JR, Lal D, Reinthaler EM, Steiner I, Nothnagel M, Alber M *et al.* Mutations in  
584 GRIN2A cause idiopathic focal epilepsy with rolandic spikes. *Nat Genet* 2013; **45**(9):  
585 1067-1072.
- 586  
587 3. Carvill GL, Regan BM, Yendle SC, O'Roak BJ, Lozovaya N, Bruneau N *et al.* GRIN2A  
588 mutations cause epilepsy-aphasia spectrum disorders. *Nat Genet* 2013; **45**(9): 1073-1076.
- 589  
590 4. de Ligt J, Willemsen MH, van Bon BW, Kleefstra T, Yntema HG, Kroes T *et al.*  
591 Diagnostic exome sequencing in persons with severe intellectual disability. *N Engl J Med*  
592 2012; **367**(20): 1921-1929.
- 593  
594 5. Lesca G, Rudolf G, Bruneau N, Lozovaya N, Labalme A, Boutry-Kryza N *et al.* GRIN2A  
595 mutations in acquired epileptic aphasia and related childhood focal epilepsies and  
596 encephalopathies with speech and language dysfunction. *Nat Genet* 2013; **45**(9): 1061-  
597 1066.
- 598  
599 6. Ende S, Rosenberger G, Geider K, Popp B, Tamer C, Stefanova I *et al.* Mutations in  
600 GRIN2A and GRIN2B encoding regulatory subunits of NMDA receptors cause variable  
601 neurodevelopmental phenotypes. *Nat Genet* 2010; **42**(11): 1021-1026.
- 602  
603 7. Tarabeux J, Kebir O, Gauthier J, Hamdan FF, Xiong L, Piton A *et al.* Rare mutations in  
604 N-methyl-D-aspartate glutamate receptors in autism spectrum disorders and  
605 schizophrenia. *Transl Psychiatry* 2011; **1**: e55.
- 606  
607 8. Garcia-Recio A, Santos-Gomez A, Soto D, Julia-Palacios N, Garcia-Cazorla A, Altafaj X  
608 *et al.* GRIN database: A unified and manually curated repertoire of GRIN variants. *Hum*  
609 *Mutat* 2021; **42**(1): 8-18.
- 610  
611 9. Lemke JR, Geider K, Helbig KL, Heyne HO, Schutz H, Hentschel J *et al.* Delineating the  
612 GRIN1 phenotypic spectrum: A distinct genetic NMDA receptor encephalopathy.  
613 *Neurology* 2016; **86**(23): 2171-2178.
- 614  
615 10. Burnashev N, Szepetowski P. NMDA receptor subunit mutations in neurodevelopmental  
616 disorders. *Curr Opin Pharmacol* 2015; **20**: 73-82.

617

- 618 11. Yuan H, Low CM, Moody OA, Jenkins A, Traynelis SF. Ionotropic GABA and  
619 Glutamate Receptor Mutations and Human Neurologic Diseases. *Mol Pharmacol* 2015;  
620 **88**(1): 203-217.
- 621
- 622 12. Forrest D, Yuzaki M, Soares HD, Ng L, Luk DC, Sheng M *et al.* Targeted disruption of  
623 NMDA receptor 1 gene abolishes NMDA response and results in neonatal death. *Neuron*  
624 1994; **13**(2): 325-338.
- 625
- 626 13. Li Y, Erzurumlu RS, Chen C, Jhaveri S, Tonegawa S. Whisker-related neuronal patterns  
627 fail to develop in the trigeminal brainstem nuclei of NMDAR1 knockout mice. *Cell* 1994;  
628 **76**(3): 427-437.
- 629
- 630 14. Sprengel R, Single FN. Mice with genetically modified NMDA and AMPA receptors.  
631 *Ann N Y Acad Sci* 1999; **868**(1 MOLECULAR AND): 494-501.
- 632
- 633 15. Fayyazuddin A, Villarroel A, Le Goff A, Lerma J, Neyton J. Four residues of the  
634 extracellular N-terminal domain of the NR2A subunit control high-affinity Zn<sup>2+</sup> binding  
635 to NMDA receptors. *Neuron* 2000; **25**(3): 683-694.
- 636
- 637 16. Amico-Ruvio SA, Paganelli MA, Abbott JA, Myers JM, Kasperek EM, Iacobucci GI *et*  
638 *al.* Contributions by N-terminal Domains to NMDA Receptor Currents. *bioRxiv* 2020:  
639 2020.2008.2021.261388.
- 640
- 641 17. Maki BA, Aman TK, Amico-Ruvio SA, Kussius CL, Popescu GK. C-terminal domains  
642 of N-methyl-D-aspartic acid receptor modulate unitary channel conductance and gating. *J*  
643 *Biol Chem* 2012; **287**(43): 36071-36080.
- 644
- 645 18. Sprengel R, Suchanek B, Amico C, Brusa R, Burnashev N, Rozov A *et al.* Importance of  
646 the intracellular domain of NR2 subunits for NMDA receptor function in vivo. *Cell* 1998;  
647 **92**(2): 279-289.
- 648
- 649 19. Pierson TM, Yuan H, Marsh ED, Fuentes-Fajardo K, Adams DR, Markello T *et al.*  
650 GRIN2A mutation and early-onset epileptic encephalopathy: personalized therapy with  
651 memantine. *Ann Clin Transl Neurol* 2014; **1**(3): 190-198.
- 652
- 653 20. Ogden KK, Chen W, Swanger SA, McDaniel MJ, Fan LZ, Hu C *et al.* Molecular  
654 Mechanism of Disease-Associated Mutations in the Pre-M1 Helix of NMDA Receptors  
655 and Potential Rescue Pharmacology. *PLoS Genet* 2017; **13**(1): e1006536.

656

- 657 21. Amin JB, Leng X, Gochman A, Zhou HX, Wollmuth LP. A conserved glycine harboring  
658 disease-associated mutations permits NMDA receptor slow deactivation and high Ca(2+)  
659 permeability. *Nat Commun* 2018; **9**(1): 3748.
- 660
- 661 22. Yuan H, Hansen KB, Zhang J, Pierson TM, Markello TC, Fajardo KV *et al.* Functional  
662 analysis of a de novo GRIN2A missense mutation associated with early-onset epileptic  
663 encephalopathy. *Nat Commun* 2014; **5**: 3251.
- 664
- 665 23. Fedele L, Newcombe J, Topf M, Gibb A, Harvey RJ, Smart TG. Disease-associated  
666 missense mutations in GluN2B subunit alter NMDA receptor ligand binding and ion  
667 channel properties. *Nat Commun* 2018; **9**(1): 957.
- 668
- 669 24. Li D, Yuan H, Ortiz-Gonzalez XR, Marsh ED, Tian L, McCormick EM *et al.* GRIN2D  
670 Recurrent De Novo Dominant Mutation Causes a Severe Epileptic Encephalopathy  
671 Treatable with NMDA Receptor Channel Blockers. *Am J Hum Genet* 2016; **99**(4): 802-  
672 816.
- 673
- 674 25. Chen W, Shieh C, Swanger SA, Tankovic A, Au M, McGuire M *et al.* GRIN1 mutation  
675 associated with intellectual disability alters NMDA receptor trafficking and function. *J*  
676 *Hum Genet* 2017; **62**(6): 589-597.
- 677
- 678 26. Serraz B, Grand T, Paoletti P. Altered zinc sensitivity of NMDA receptors harboring  
679 clinically-relevant mutations. *Neuropharmacology* 2016; **109**: 196-204.
- 680
- 681 27. Marwick KFM, Parker P, Skehel P, Hardingham G, Wyllie DJA. Functional assessment  
682 of the NMDA receptor variant GluN2A (R586K). *Wellcome Open Res* 2017; **2**: 20.
- 683
- 684 28. Marwick KFM, Hansen KB, Skehel PA, Hardingham GE, Wyllie DJA. Functional  
685 assessment of triheteromeric NMDA receptors containing a human variant associated  
686 with epilepsy. *J Physiol* 2019; **597**(6): 1691-1704.
- 687
- 688 29. Marwick K, Skehel P, Hardingham G, Wyllie D. Effect of a GRIN2A de novo mutation  
689 associated with epilepsy and intellectual disability on NMDA receptor currents and  
690 Mg(2+) block in cultured primary cortical neurons. *Lancet* 2015; **385 Suppl 1**: S65.
- 691
- 692 30. Iacobucci GJ, Popescu GK. NMDA receptors: linking physiological output to biophysical  
693 operation. *Nat Rev Neurosci* 2017; **18**(4): 236-249.
- 694
- 695 31. Hansen KB, Yi F, Perszyk RE, Furukawa H, Wollmuth LP, Gibb AJ *et al.* Structure,  
696 function, and allosteric modulation of NMDA receptors. *J Gen Physiol* 2018; **150**(8):  
697 1081-1105.

- 698  
699 32. Elmasri M, Hunter DW, Winchester G, Bates EE, Aziz W, Van Der Does DM *et al.*  
700 Common synaptic phenotypes arising from diverse mutations in the human NMDA  
701 receptor subunit GluN2A. *Commun Biol* 2022; **5**(1): 174.
- 702  
703 33. Elmasri M, Lotti JS, Aziz W, Steele OG, Karachaliou E, Sakimura K *et al.* Synaptic  
704 Dysfunction by Mutations in GRIN2B: Influence of Triheteromeric NMDA Receptors on  
705 Gain-of-Function and Loss-of-Function Mutant Classification. *Brain Sci* 2022; **12**(6).
- 706  
707 34. Iacobucci GJ, Wen H, Helou M, Liu B, Zheng W, Popescu GK. Cross-subunit  
708 interactions that stabilize open states mediate gating in NMDA receptors. *Proc Natl Acad*  
709 *Sci U S A* 2021; **118**(2).
- 710  
711 35. Longo PA, Kavran JM, Kim MS, Leahy DJ. Transient mammalian cell transfection with  
712 polyethylenimine (PEI). *Methods Enzymol* 2013; **529**: 227-240.
- 713  
714 36. Barry PH, Lynch JW. Liquid junction potentials and small cell effects in patch-clamp  
715 analysis. *J Membr Biol* 1991; **121**(2): 101-117.
- 716  
717 37. Lewis CA. Ion-concentration dependence of the reversal potential and the single channel  
718 conductance of ion channels at the frog neuromuscular junction. *J Physiol* 1979; **286**:  
719 417-445.
- 720  
721 38. Qin F. Restoration of single-channel currents using the segmental k-means method based  
722 on hidden Markov modeling. *Biophys J* 2004; **86**(3): 1488-1501.
- 723  
724 39. Qin F, Auerbach A, Sachs F. Maximum likelihood estimation of aggregated Markov  
725 processes. *Proc Biol Sci* 1997; **264**(1380): 375-383.
- 726  
727 40. Kussius CL, Kaur N, Popescu GK. Pregnanolone sulfate promotes desensitization of  
728 activated NMDA receptors. *J Neurosci* 2009; **29**(21): 6819-6827.
- 729  
730 41. Popescu G, Robert A, Howe JR, Auerbach A. Reaction mechanism determines NMDA  
731 receptor response to repetitive stimulation. *Nature* 2004; **430**(7001): 790-793.
- 732  
733 42. Zheng W, Wen H, Iacobucci GJ, Popescu GK. Probing the Structural Dynamics of the  
734 NMDA Receptor Activation by Coarse-Grained Modeling. *Biophys J* 2017; **112**(12):  
735 2589-2601.
- 736



- 737 43. Lee CH, Lu W, Michel JC, Goehring A, Du J, Song X *et al.* NMDA receptor structures  
738 reveal subunit arrangement and pore architecture. *Nature* 2014; **511**(7508): 191-197.
- 739
- 740 44. Tajima N, Karakas E, Grant T, Simorowski N, Diaz-Avalos R, Grigorieff N *et al.*  
741 Activation of NMDA receptors and the mechanism of inhibition by ifenprodil. *Nature*  
742 2016; **534**(7605): 63-68.
- 743
- 744 45. Smart OS, Neduvilil JG, Wang X, Wallace BA, Sansom MS. HOLE: a program for the  
745 analysis of the pore dimensions of ion channel structural models. *Journal of molecular*  
746 *graphics* 1996; **14**(6): 354-360, 376.
- 747
- 748 46. Phillips JC, Braun R, Wang W, Gumbart J, Tajkhorshid E, Villa E *et al.* Scalable  
749 molecular dynamics with NAMD. *J Comput Chem* 2005; **26**(16): 1781-1802.
- 750
- 751 47. Humphrey W, Dalke A, Schulten K. VMD: visual molecular dynamics. *Journal of*  
752 *molecular graphics* 1996; **14**(1): 33-38, 27-38.
- 753
- 754 48. Landrum MJ, Lee JM, Riley GR, Jang W, Rubinstein WS, Church DM *et al.* ClinVar:  
755 public archive of relationships among sequence variation and human phenotype. *Nucleic*  
756 *Acids Res* 2014; **42**(Database issue): D980-985.
- 757
- 758 49. Gibb AJ, Ogden KK, McDaniel MJ, Vance KM, Kell SA, Butch C *et al.* A structurally  
759 derived model of subunit-dependent NMDA receptor function. *J Physiol* 2018; **596**(17):  
760 4057-4089.
- 761
- 762 50. Horovitz A. Double-mutant cycles: a powerful tool for analyzing protein structure and  
763 function. *Folding and Design* 1996; **1**(6): R121-R126.
- 764
- 765 51. Maki BA, Cummings KA, Paganelli MA, Murthy SE, Popescu GK. One-channel cell-  
766 attached patch-clamp recording. *J Vis Exp* 2014; (88).
- 767
- 768 52. Amico-Ruvio SA, Popescu GK. Stationary gating of GluN1/GluN2B receptors in intact  
769 membrane patches. *Biophys J* 2010; **98**(7): 1160-1169.
- 770
- 771 53. Cummings KA, Iacobucci GJ, Popescu GK. Extracting Rate Constants for NMDA  
772 Receptor Gating from One-Channel Current Recordings. In: Popescu GK (ed). *Ionotropic*  
773 *Glutamate Receptor Technologies*, vol. 106. Springer New York 2016, pp 273-299.
- 774

- 775 54. Chowdhury S, Haehnel BM, Chanda B. A self-consistent approach for determining  
776 pairwise interactions that underlie channel activation. *J Gen Physiol* 2014; **144**(5): 441-  
777 455.
- 778
- 779 55. Popescu G, Auerbach A. Modal gating of NMDA receptors and the shape of their  
780 synaptic response. *Nat Neurosci* 2003; **6**(5): 476-483.
- 781
- 782 56. Maki BA, Popescu GK. Extracellular Ca(2+) ions reduce NMDA receptor conductance  
783 and gating. *J Gen Physiol* 2014; **144**(5): 379-392.
- 784
- 785 57. Hardingham GE, Bading H. Synaptic versus extrasynaptic NMDA receptor signalling:  
786 implications for neurodegenerative disorders. *Nat Rev Neurosci* 2010; **11**(10): 682-696.
- 787
- 788 58. Amin JB, Gochman A, He M, Certain N, Wollmuth LP. NMDA Receptors Require  
789 Multiple Pre-opening Gating Steps for Efficient Synaptic Activity. *Neuron* 2021; **109**(3):  
790 488-501 e484.
- 791
- 792 59. Lau AY, Salazar H, Blachowicz L, Ghisi V, Plested AJ, Roux B. A conformational  
793 intermediate in glutamate receptor activation. *Neuron* 2013; **79**(3): 492-503.
- 794
- 795 60. Baranovic J, Chebli M, Salazar H, Carbone AL, Faelber K, Lau AY *et al.* Dynamics of  
796 the Ligand Binding Domain Layer during AMPA Receptor Activation. *Biophys J* 2016;  
797 **110**(4): 896-911.
- 798
- 799 61. Meyerson JR, Kumar J, Chittori S, Rao P, Pierson J, Bartesaghi A *et al.* Structural  
800 mechanism of glutamate receptor activation and desensitization. *Nature* 2014; **514**(7522):  
801 328-334.
- 802
- 803 62. Kazi R, Dai J, Sweeney C, Zhou HX, Wollmuth LP. Mechanical coupling maintains the  
804 fidelity of NMDA receptor-mediated currents. *Nat Neurosci* 2014; **17**(7): 914-922.
- 805
- 806 63. Balannik V, Menniti FS, Paternain AV, Lerma J, Stern-Bach Y. Molecular mechanism of  
807 AMPA receptor noncompetitive antagonism. *Neuron* 2005; **48**(2): 279-288.
- 808
- 809 64. Perszyk R, Katzman BM, Kusumoto H, Kell SA, Epplin MP, Tahirovic YA *et al.* An  
810 NMDAR positive and negative allosteric modulator series share a binding site and are  
811 interconverted by methyl groups. *Elife* 2018; **7**.
- 812

- 813 65. Perszyk RE, Swanger SA, Shelley C, Khatri A, Fernandez-Cuervo G, Epplin MP *et al.*  
814 Biased modulators of NMDA receptors control channel opening and ion selectivity. *Nat*  
815 *Chem Biol* 2020; **16**(2): 188-196.
- 816  
817 66. Watanabe J, Beck C, Kuner T, Premkumar LS, Wollmuth LP. DRPEER: a motif in the  
818 extracellular vestibule conferring high Ca<sup>2+</sup> flux rates in NMDA receptor channels. *J*  
819 *Neurosci* 2002; **22**(23): 10209-10216.
- 820  
821 67. Talukder I, Borker P, Wollmuth LP. Specific sites within the ligand-binding domain and  
822 ion channel linkers modulate NMDA receptor gating. *J Neurosci* 2010; **30**(35): 11792-  
823 11804.
- 824  
825 68. Schmid SM, Korber C, Herrmann S, Werner M, Hollmann M. A domain linking the  
826 AMPA receptor agonist binding site to the ion pore controls gating and causes lurcher  
827 properties when mutated. *J Neurosci* 2007; **27**(45): 12230-12241.
- 828  
829 69. Kazi R, Gan Q, Talukder I, Markowitz M, Salussolia CL, Wollmuth LP. Asynchronous  
830 Movements Prior to Pore Opening in NMDA Receptors. *J Neurosci* 2013; **33**(29):  
831 12052-12066.
- 832  
833 70. Tian N, Boring M, Kobau R, Zack MM, Croft JB. Active Epilepsy and Seizure Control in  
834 Adults - United States, 2013 and 2015. *MMWR Morb Mortal Wkly Rep* 2018; **67**(15):  
835 437-442.
- 836  
837 71. Kalilani L, Sun X, Pelgrims B, Noack-Rink M, Villanueva V. The epidemiology of drug-  
838 resistant epilepsy: A systematic review and meta-analysis. *Epilepsia* 2018; **59**(12): 2179-  
839 2193.
- 840  
841 72. Strehlow V, Heyne HO, Vlaskamp DRM, Marwick KFM, Rudolf G, de Bellescize J *et al.*  
842 GRIN2A-related disorders: genotype and functional consequence predict phenotype.  
843 *Brain* 2019; **142**(1): 80-92.
- 844  
845 73. McDaniel MJ, Ogden KK, Kell SA, Burger PB, Liotta DC, Traynelis SF. NMDA  
846 receptor channel gating control by the pre-M1 helix. *J Gen Physiol* 2020; **152**(4).
- 847  
848 74. Kaniakova M, Kleteckova L, Lichnerova K, Holubova K, Skrenkova K, Korinek M *et al.*  
849 7-Methoxyderivative of tacrine is a 'foot-in-the-door' open-channel blocker of  
850 GluN1/GluN2 and GluN1/GluN3 NMDA receptors with neuroprotective activity in vivo.  
851 *Neuropharmacology* 2018; **140**: 217-232.

- 853 75. Popescu G. Principles of N-methyl-D-aspartate receptor allosteric modulation. *Mol*  
854 *Pharmacol* 2005; **68**(4): 1148-1155.
- 855  
856 76. Glasgow NG, Povysheva NV, Azofeifa AM, Johnson JW. Memantine and Ketamine  
857 Differentially Alter NMDA Receptor Desensitization. *J Neurosci* 2017; **37**(40): 9686-  
858 9704.
- 859  
860 77. Popescu G. Mechanism-based targeting of NMDA receptor functions. *Cell Mol Life Sci*  
861 2005; **62**(18): 2100-2111.
- 862  
863  
864

865 **Figure Legends**

866 *Figure 1*

867 **Two residues important for normal neurological function interact during NMDA receptor**  
868 **gating. (a)** Structural model of a core GluN1/GluN2A receptor lacking NTD and CTD (N1<sub>ΔNΔC</sub>,  
869 tan; N2A<sub>ΔNΔC</sub>, cyan). **(b)** Within the GluN2A subunit, the interaction between P552 and F652  
870 (*top*) is activity-dependent as indicated by smaller center of mass distance (COM) (*bottom left*),  
871 and stronger Van der Waals contact energy (VdW) (*bottom right*), in open versus closed conformations.  
872 \* $p < 0.05$  Kolmogorov-Smirnoff test. **(c)** Substitutions at both P552 and F652 change  
873 the VdW contact energy between these residues in structural models of open receptors, consistent  
874 with the disruption of a gating-favorable interaction. \* $p < 0.05$  Kolmogorov-Smirnoff test. **(d)**  
875 Side chains of both P552 and F652 contribute to the gating kinetics of full-length NMDA receptors;  
876 substitutions at these sites (P/A and F/V) changed the pattern of current recorded from individual  
877 receptors, the distribution of closed (black) and open (red) intervals, and the gating rate constants  
878 calculated with the indicated state models. Macroscopic current responses to pulses (5 s) of glutamate  
879 (1 mM) predicted by each model (red) are shown superimposed with experimentally recorded whole-cell  
880 currents (green and yellow). \* $p < 0.05$  two-tailed t-test. **(e, left)** Diagram of the thermodynamic cycle  
881 used to calculate the coupling energy between P552 and F652 using the rates illustrated in panel d. **(right)**  
882 Energy landscapes calculated for the gating reactions of individual receptors illustrate increased barriers  
883 to activation in receptors with mutations at disease-associated residues.

885

886 *Figure 2*

887 **NMDA receptor variants associated with neurological dysfunction display a broad range of**  
888 **gating perturbations.** (a) Structural models of open NMDA receptors variants illustrate the rela-  
889 tive positions of two disease-associated residues. (b) Relative to receptors with wild-type resi-  
890 dues, the modeled open states of receptors with disease-associated mutations have distinct Van  
891 der Waals contact energies (VdW) between residues 552 and 652 of GluN2A (\* $p < 0.05$ ; Kolmo-  
892 gorov-Smirnov test). (c, top) Currents recorded from individual full-length GluN1/GluN2A<sup>P552R</sup>  
893 receptors ( $n = 16$ ); (middle) Dwell-time histograms of closed (left) and open (right) interval dura-  
894 tions with superimposed distributions (lines) predicted by the model illustrated below; (bottom)  
895 Energy landscapes calculated from the kinetic models derived for the indicated receptors. (d)  
896 Distributions of gating parameters estimated for the indicated full length receptor types: open  
897 probabilities ( $P_o$ ), mean open (MOT) and mean closed (MCT) durations estimated for entire rec-  
898 ords or for bursts of activity. (\* $p < 0.05$ ; Student's  $t$  test).

899

900 *Figure 3*

901 **NMDA receptor variants associated with neurological dysfunction display changes in con-**  
902 **ductance and permeability.** (a) Top, Whole-cell current trace recorded in response to Glu appli-  
903 cation (1 mM) illustrates change in steady-state current amplitude during a ramp in the mem-  
904 brane potential. Bottom, Macroscopic current-voltage relationships measured from recordings as  
905 in panel a. (b) Ca<sup>2+</sup> permeability properties inferred from macroscopic current recordings as in a.  
906 (c) Top, Unitary current traces recorded from cell-attached patches with +100 mV applied poten-  
907 tial and external Ca<sup>2+</sup> as indicated. Bottom, Unitary current-voltage relationships for the indicated  
908 receptors and summary of results. (\* $p < 0.05$ ; Student's  $t$  test relative to WT).

909

910 *Figure 4*

911 **Disease-associated variants display complex functional changes.** (a, *left*) Whole-cell currents  
912 evoked with several concentrations of glutamate in saturating glycine (0.1 mM); (*right*) Gluta-  
913 mate dose-dependence of the macroscopic steady-state current amplitude. (b, *left*) The rise and  
914 decay phases of the macroscopic current (black) recorded from the GluN1/GluN2A<sup>P552R</sup> variant  
915 superimposed with fits to exponential functions (red). (*Right*) Glutamate dose-dependence of the  
916 rise time (circles) and fit to linear function (line) used to estimate the apparent glutamate binding  
917 rate. (c, *left*) Reaction mechanisms derived from fitting each model simultaneously to all single-  
918 channel recordings in each data set. (*Right*) Macroscopic current responses simulated with the  
919 respective kinetic models (*left*) and corresponding experimentally recorded whole-cell currents  
920 (*right*). (d) Simulated responses to a synaptic-like glutamate exposure (1 ms, 1 mM) predict  
921 drastic changes in peak current levels (left), time course (middle), and charge transfer. (e) Simu-  
922 lated responses to extrasynaptic-like glutamate exposure (5 s, 2  $\mu$ M) predict complex changes in  
923 steady-state current levels (left), kinetics (middle), and charge transfer (right). (f) *Top*, Simulated  
924 responses to repetitive exposure to synaptic-like pulses predict complex changes in frequency-  
925 dependent facilitation. *Bottom*, Cumulative charge transfer over 60 sec of repetitive stimulation  
926 over varying physiologic frequencies. (g) *Top*, Simulation response to standard theta-burst stimu-  
927 lation. *Middle*, Expanded view of the normalized response to a single train of stimuli. *Bottom*,  
928 Expanded view of the normalized response to the first and last epoch of the first train of stimuli.

929

930 *Figure 5*

931 **Proposed role of P552/F652 interaction in the gating reaction of NMDA receptors.** (1) Resi-  
932 dues on the D2-M1 linker of GluN2A subunits (blue), such as L550 and P552, interact directly  
933 with residues located on the gate-forming M3 helix of the same subunit (P552/F652) or of the  
934 adjacent GluN1 subunit (yellow) (L550/I642). (2) Agonist-triggered contraction of the LBD do-  
935 main induces outward movement of the D2-M1 linker and causes (3) stabilization of the open  
936 M3 position.

937

### 938 **Supplementary Figures**

939 *Figure S1*

940 Empiric cumulative distribution functions (ECDF) of residue sidechain center-of-mass (COM)  
941 distance and van der Waals (VdW) contact energy during MD simulation of the active/open  
942 structure for each construct. Data points and dashed lines indicate Kolmogorov-Smirnov test sta-  
943 tistic for each construct.

944

945

946

947

948

949

950

951



952 **Supplementary Tables**

*Table S1: Summary of single-channel gating parameters*

|                         | n  | i (pA)     | P <sub>o</sub> | MCT (ms)  | MOT (ms)   | Record time (min) | Total events |
|-------------------------|----|------------|----------------|-----------|------------|-------------------|--------------|
| GluN2A                  | 11 | 8.9 ± 0.4  | 0.46 ± 0.05    | 6 ± 1     | 3.9 ± 0.4  | 360               | 2,608,269    |
| GluN2A <sup>P552R</sup> | 16 | 4.4 ± 0.1* | 0.02 ± 0.01*   | 479 ± 98* | 5.5 ± 0.8  | 293               | 56,838       |
| GluN2A <sup>F652V</sup> | 14 | 5.6 ± 0.2* | 0.01 ± 0.00*   | 92 ± 18*  | 0.7 ± 0.1* | 355               | 307,378      |

\*  $p < 0.05$  relative to WT (Student's  $t$  test)

953

*Table S2: Summary of MIL exponential fits*

|                         | Closed Components              |                              |                              |                                |                                | Open Components                |                                |
|-------------------------|--------------------------------|------------------------------|------------------------------|--------------------------------|--------------------------------|--------------------------------|--------------------------------|
|                         | $\tau_3$ (A <sub>3</sub> )     | $\tau_2$ (A <sub>2</sub> )   | $\tau_1$ (A <sub>1</sub> )   | $\tau_4$ (A <sub>4</sub> )     | $\tau_5$ (A <sub>5</sub> )     | $\tau_1$ (A <sub>1</sub> )     | $\tau_2$ (A <sub>2</sub> )     |
| GluN2A                  | 0.16 ± 0.01<br>(0.35 ± 0.04)   | 1.24 ± 0.07<br>(0.29 ± 0.04) | 4.4 ± 0.4<br>(0.34 ± 0.04)   | 24 ± 5<br>(0.015 ± 0.003)      | 2947 ± 429<br>(0.002 ± 0.000)  | 0.12 ± 0.01<br>(0.11 ± 0.02)   | 3.0 ± 0.5<br>(0.47 ± 0.04)     |
| GluN2A <sup>P552R</sup> | 0.26 ± 0.02*<br>(0.79 ± 0.05*) | 3.5 ± 0.7*<br>(0.13 ± 0.06)  | 167 ± 89<br>(0.016 ± 0.003*) | 9514 ± 1881*<br>(0.10 ± 0.01*) | --                             | 1.5 ± 0.4*<br>(0.22 ± 0.04*)   | 9.4 ± 1.3*<br>(0.69 ± 0.04*)   |
| GluN2A <sup>F652V</sup> | 0.15 ± 0.01<br>(0.14 ± 0.01*)  | 8.4 ± 1.2*<br>(0.26 ± 0.03*) | 39 ± 5*<br>(0.49 ± 0.03*)    | 384 ± 107*<br>(0.08 ± 0.02*)   | 2393 ± 590<br>(0.029 ± 0.004*) | 0.37 ± 0.03*<br>(0.63 ± 0.06*) | 1.20 ± 0.09*<br>(0.35 ± 0.05*) |

954 \*  $p < 0.05$  relative to WT (Student's  $t$  test)

955

*Table S3: Summary of phenotype classification by parameter\**

|                                    | GluN2A <sup>P552R</sup> | GluN2A <sup>F652V</sup> |
|------------------------------------|-------------------------|-------------------------|
| P <sub>o</sub>                     | LOF                     | LOF                     |
| P <sub>o,burst</sub>               | GOF                     | LOF                     |
| MOT                                | -                       | LOF                     |
| MCT                                | LOF                     | LOF                     |
| $\gamma_{Na}$                      | LOF                     | LOF                     |
| $\gamma_{2Ca}$                     | -                       | -                       |
| $\gamma_{2Ca}/\gamma_{Na}$         | GOF                     | GOF                     |
| $\gamma_{5Ca}/\gamma_{Na}$         | GOF                     | GOF                     |
| P <sub>5Ca</sub> /P <sub>Na</sub>  | LOF                     | -                       |
| P <sub>10Ca</sub> /P <sub>Na</sub> | LOF                     | -                       |
| Glu EC <sub>50</sub>               | GOF                     | -                       |
| $\tau_D$                           | GOF                     | LOF                     |

956 \* classification based on predicted relative effect on Ca<sup>2+</sup> flux

957

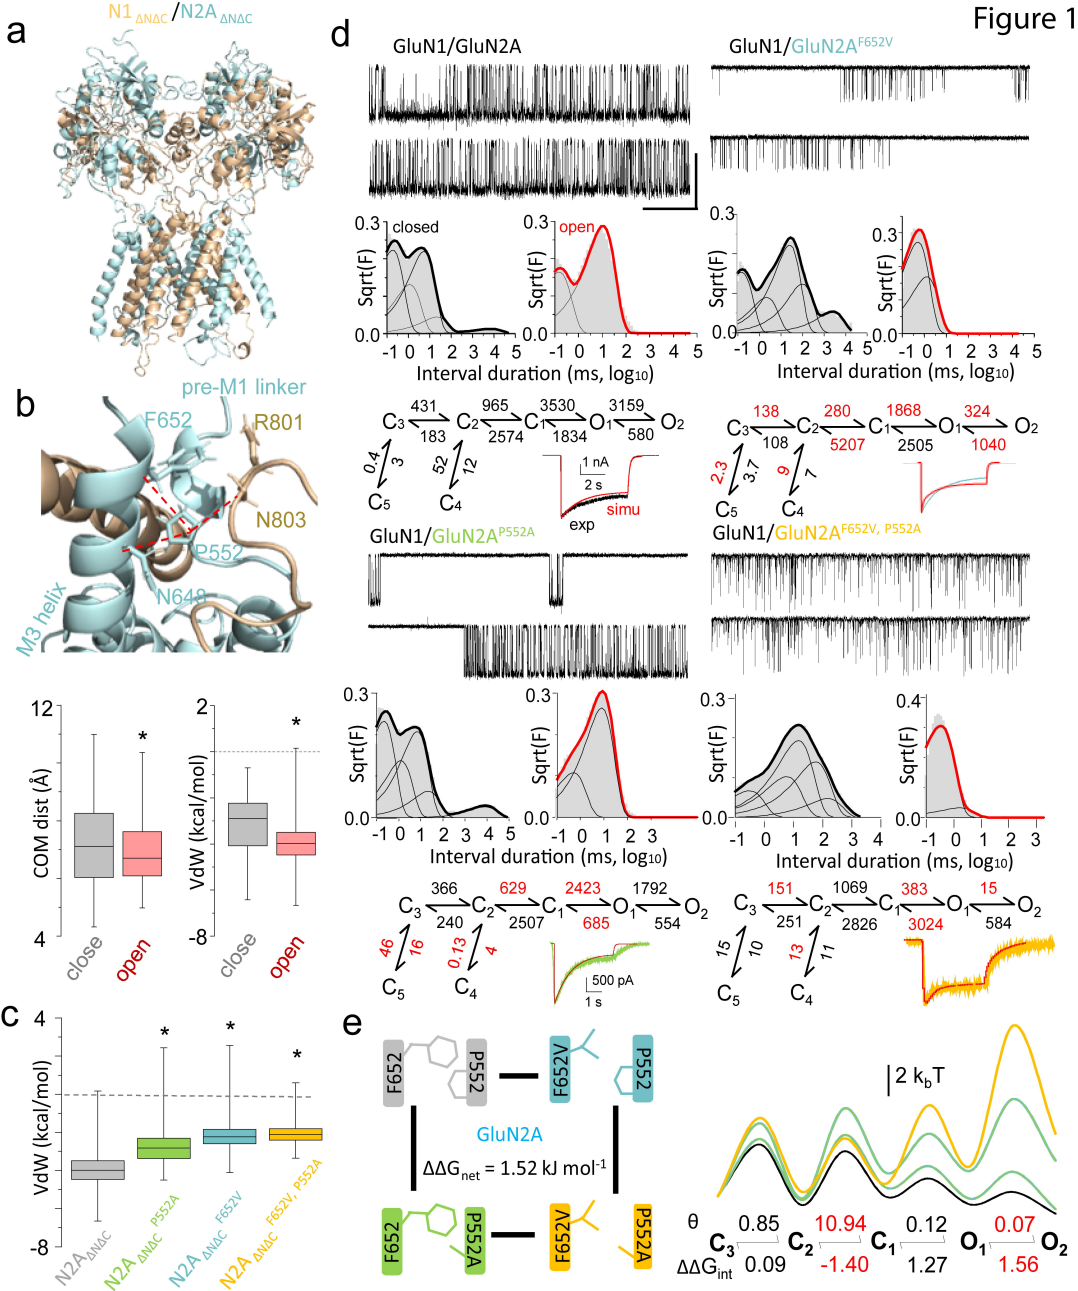

a

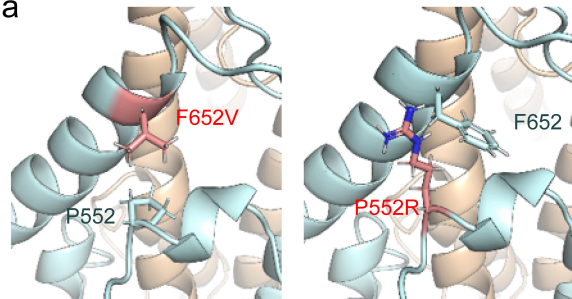

b

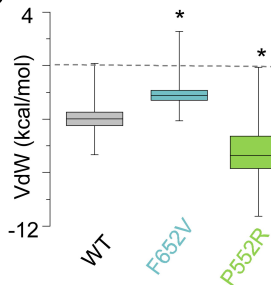

c P552R

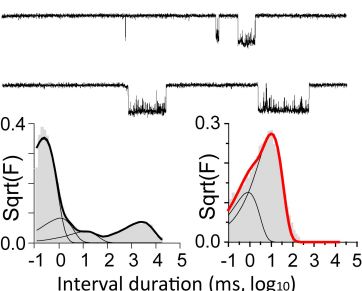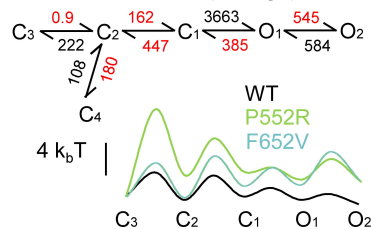

d

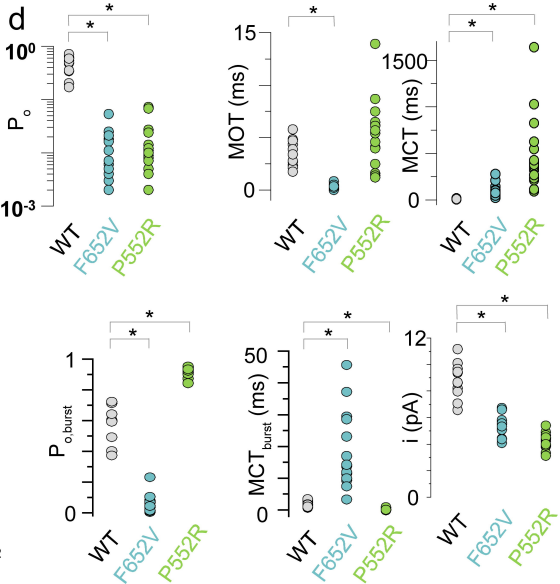

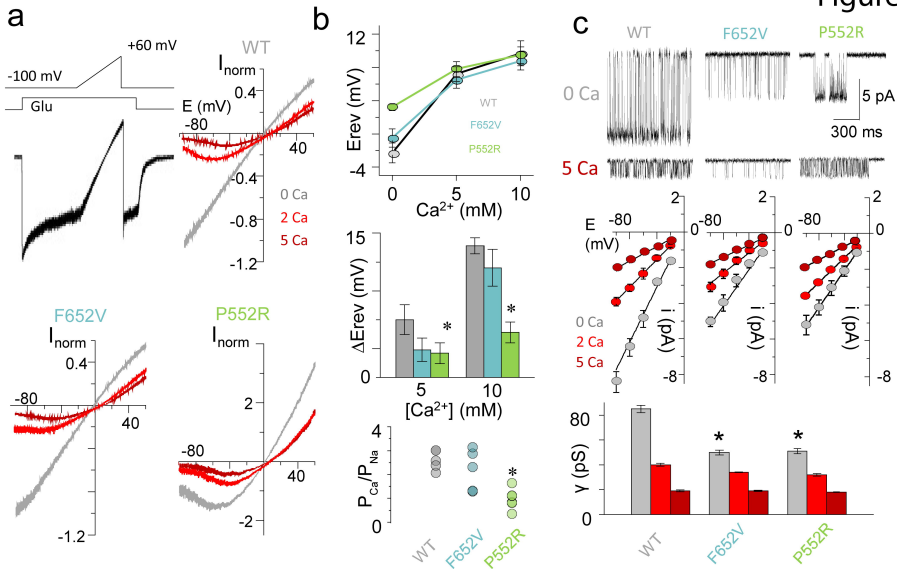

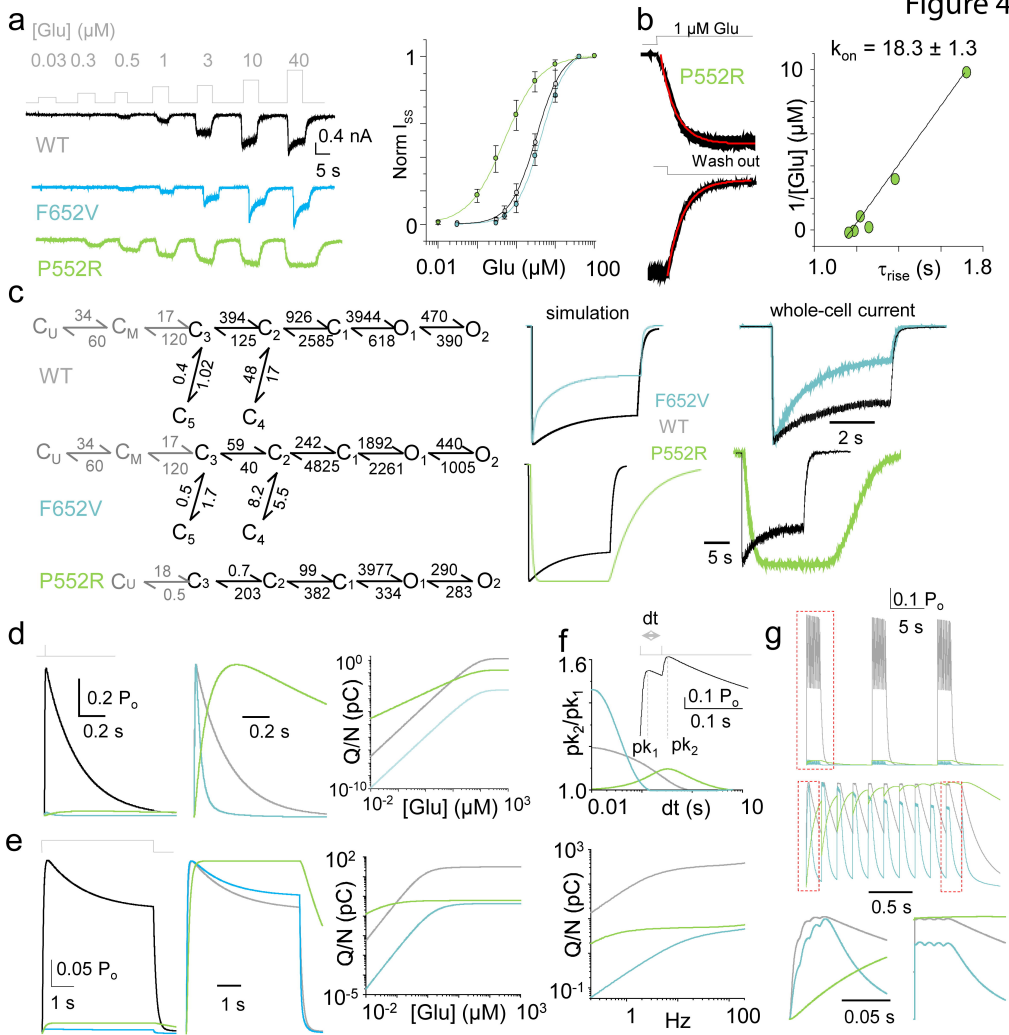

Figure 5

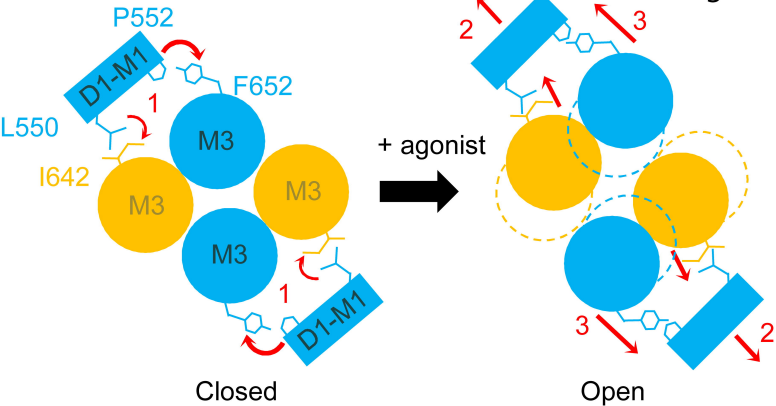

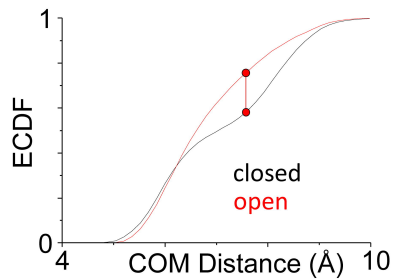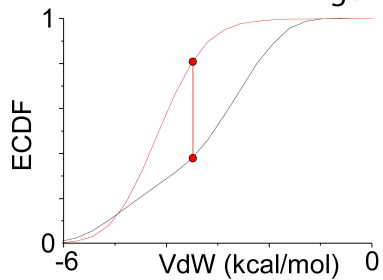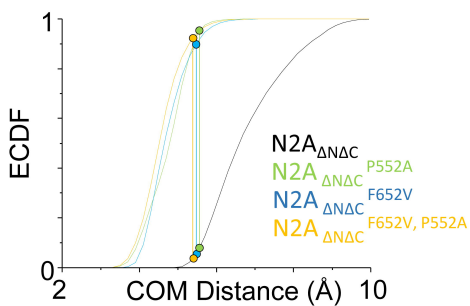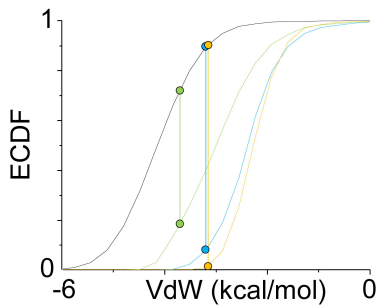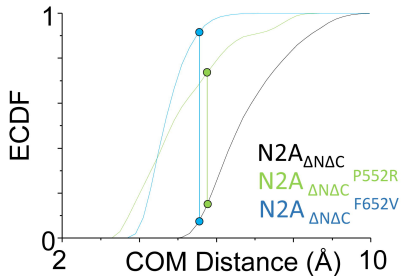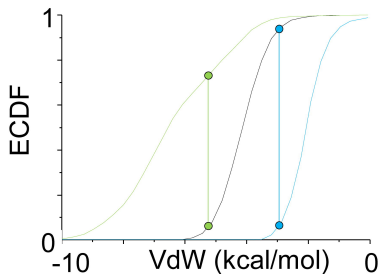

Source: http://biorxiv.org/content/10.1101/2022.07.01.498520v1.full.pdf
